# Supplementary material for: Psychological Abuse and Social Support in Chinese Adolescents: The Mediating Effect of Self-Esteem
Source: Front Psychol. 2022 Mar 24;13:852256. doi: 10.3389/fpsyg.2022.852256 (PMC8989465; doi:10.3389/fpsyg.2022.852256)
Supplement: Supplementary file 1 [file Data_Sheet_1.csv]

number	age	gender	onlychild	familyincome	Compared to others and I was regarded worthless by my parents	My parents did not give me good faces	My parents counted my shortcomings in front of others	My parents humuliated me incidentely	My parents yelled at me	When I was upset, my parents listened and helped me without patience	My parents flew off the handle to me	My parents threatened me, such as kick you out, without meals	My parents throwed out things that I loved	My parents wanted to know details about my friends	My parents went snooping around in my diaries	My parents did not like me to get along with my classmate after school	My parents eavesdropping on phnoe when I have a conversation	My parents just allowed to make friends with good students	when I have problems, someone will help me	I can share my happiness and sorrows with someone	my family can give me supports	my family can give me suport when I needed	when I have problems, someone can consolo me	my friends can really help me	when I have problems, I can depend on my friends	I can discuss my problems with my family	I can share my happiness and sorrows with my friends	someone in my life care about me	my family can help me to make some decisions	I can discuss my problems with my friends	I feel I am valuble person	I feel that I have lots of good qualities	I feel I am a loser	I can finish things well like others	I think few things can make me proud	I have positive attitudes to myself	I am satisfied with myself	I hope I can received much more respect	I feel worthless	I feel I have no strengths
1	18	2	2	3	2	1	3	1	2	2	2	2	2	3	1	1	1	1	3	4	6	6	5	5	5	4	4	4	5	4	3	3	3	3	2	3	3	2	3	3
2	16	2	1	2	1	1	1	1	1	1	1	1	1	1	1	1	1	1	2	5	5	5	5	5	5	5	4	4	4	3	2	2	3	2	2	2	3	3	3	3
3	17	2	2	2	2	1	1	1	1	5	1	1	1	2	1	1	1	1	7	7	7	7	7	7	7	7	7	7	7	7	4	3	3	2	3	3	4	4	4	4
4	17	2	2	2	5	5	3	5	5	5	5	5	5	5	1	5	5	5	3	1	3	1	1	3	2	1	3	2	2	2	2	3	2	2	2	2	2	3	3	4
5	19	2	1	2	3	2	4	1	1	1	1	1	1	4	1	1	1	1	3	3	3	5	5	4	3	4	3	5	5	4	2	2	2	2	2	3	2	3	3	2
6	17	1	2	4	1	2	2	1	1	1	1	1	1	1	1	1	1	1	4	5	4	5	6	5	4	4	5	5	6	5	3	2	2	3	2	3	2	3	2	4
7	17	1	1	2	3	1	1	1	2	2	3	1	1	1	1	1	1	1	5	4	4	6	6	5	5	6	6	7	6	7	3	3	1	3	1	3	3	2	1	4
8	17	2	2	1	1	2	1	1	2	1	1	1	1	1	1	1	1	1	5	4	6	6	6	5	5	5	5	4	5	5	3	3	2	2	2	2	3	2	2	3
9	17	1	2	2	3	3	3	2	3	2	3	2	2	2	4	1	2	2	4	5	1	1	2	3	4	3	5	4	4	3	2	4	2	2	2	3	2	3	4	3
10	17	2	2	3	1	2	1	1	1	1	1	1	2	4	1	1	1	2	7	7	7	7	7	6	6	7	7	7	7	7	4	3	3	3	4	3	3	4	4	3
11	16	1	2	3	3	1	3	3	3	1	2	2	2	2	1	4	1	5	6	4	3	3	4	4	3	1	3	5	2	4	2	2	3	3	2	3	2	2	2	3
12	16	1	1	2	4	1	2	1	2	1	2	1	1	1	1	1	1	1	5	7	5	6	6	5	6	6	7	7	6	7	3	3	4	4	4	3	3	3	4	3
13	15	2	1	2	5	1	3	1	3	3	1	1	1	3	1	1	1	3	4	6	6	6	6	5	5	6	6	6	4	4	3	2	2	3	2	3	3	2	3	3
14	17	1	2	3	1	3	2	1	1	2	2	1	2	1	1	1	1	1	4	5	6	6	5	4	4	3	4	3	3	5	2	2	3	3	2	3	3	3	3	3
16	16	1	1	3	3	2	2	1	2	1	1	1	1	3	1	1	1	1	5	6	5	7	6	4	3	6	6	6	3	6	3	3	3	3	2	2	2	2	3	3
17	17	2	2	3	1	2	2	1	2	1	2	2	2	2	3	2	2	2	4	4	5	7	7	2	4	6	3	5	5	3	2	3	2	2	3	3	3	3	2	3
18	16	2	1	3	4	2	4	2	4	3	4	1	1	3	1	1	1	2	7	7	7	7	7	7	5	5	5	7	5	7	4	4	4	4	4	3	3	4	4	4
19	16	2	1	1	3	2	2	2	2	2	2	1	1	3	1	3	1	1	4	6	6	6	6	6	6	6	6	6	6	6	2	3	2	2	2	3	2	2	2	3
20	15	2	1	3	2	1	1	1	1	1	1	1	2	2	1	1	1	1	1	3	6	3	2	5	4	2	4	2	3	2	3	2	2	3	2	3	3	3	4	3
21	16	2	1	4	3	2	2	1	2	2	2	1	1	2	1	1	1	1	4	5	4	4	4	4	4	4	4	4	4	4	3	3	3	3	2	3	3	3	3	3
22	16	2	2	3	2	2	1	1	1	1	1	1	3	3	1	1	1	1	6	6	7	7	7	6	3	3	7	7	5	7	1	3	4	3	2	1	3	2	2	1
23	16	2	1	4	4	4	1	1	3	1	3	1	1	5	1	1	5	1	6	6	6	6	6	6	6	6	6	6	6	6	3	3	4	3	3	3	3	3	4	4
24	16	1	2	2	3	1	2	1	2	1	1	1	1	1	1	1	1	1	4	7	3	4	6	7	6	6	7	6	5	7	2	2	3	2	2	2	2	4	4	3
25	16	1	2	2	3	2	1	1	2	1	2	1	1	3	1	3	2	1	6	6	6	7	6	5	4	5	5	5	6	6	2	2	3	2	2	2	2	4	4	3
26	16	1	2	2	2	3	1	1	1	1	2	1	1	1	1	1	1	1	6	6	5	6	5	5	5	5	5	5	5	6	3	2	3	2	2	2	2	3	4	3
27	17	1	2	2	2	1	1	1	1	1	1	1	1	1	1	1	1	1	7	7	5	4	4	1	7	4	7	1	7	3	3	3	3	3	3	3	4	4	4	1
28	18	1	2	2	1	2	2	2	2	1	2	1	1	2	1	1	1	1	5	5	2	5	6	2	1	5	3	3	3	3	3	3	3	2	2	3	3	3	4	3
29	16	1	2	3	3	3	2	2	1	1	1	3	1	4	1	1	1	1	7	3	1	6	7	6	3	4	5	7	7	7	2	3	4	2	1	3	3	3	4	4
30	17	2	1	2	3	2	2	1	1	1	1	1	1	1	1	1	1	1	6	6	7	7	7	7	7	5	7	7	7	7	3	3	3	3	2	3	3	3	4	3
31	15	2	2	3	4	2	3	3	3	3	1	1	1	2	1	2	5	4	2	6	6	6	6	2	2	2	6	6	5	5	3	2	3	2	2	2	2	2	2	3
32	15	2	2	2	1	3	1	1	1	4	3	2	4	1	1	1	4	2	5	7	3	2	7	5	5	3	4	7	6	4	3	2	2	3	2	2	2	2	3	4
33	16	2	2	4	5	1	1	1	1	1	3	1	1	1	1	1	1	3	4	4	4	5	5	5	5	4	5	5	5	5	3	3	2	3	2	3	2	3	3	3
34	17	2	2	4	3	3	3	4	3	3	2	3	1	4	1	1	2	3	1	4	3	1	7	7	5	5	3	3	5	3	2	1	4	2	2	3	3	4	4	2
35	16	2	2	2	2	2	3	1	2	1	2	1	1	1	1	1	3	1	6	5	6	6	6	6	6	3	6	6	2	4	3	2	2	3	2	3	3	3	3	3
36	16	2	2	1	2	2	2	2	1	2	2	1	1	3	1	1	1	1	6	5	7	5	4	5	4	6	5	6	2	4	3	2	2	3	2	3	3	2	3	3
37	18	1	2	2	3	3	2	1	3	3	3	1	1	2	1	1	1	1	5	6	6	6	6	5	5	6	6	6	4	5	2	2	2	3	2	2	2	3	2	3
38	17	1	2	3	1	1	1	1	1	3	2	1	1	3	1	3	1	1	2	5	6	5	6	5	5	4	4	6	3	5	3	2	3	3	2	2	3	3	3	3
39	18	2	1	2	3	2	3	1	2	1	2	1	2	1	2	1	1	1	4	6	4	6	4	5	5	4	6	6	4	6	3	3	3	3	3	3	3	3	3	2
40	17	2	2	4	4	4	4	3	4	3	3	3	2	5	2	2	1	5	3	6	6	3	7	7	6	2	6	3	3	6	3	3	4	4	4	1	1	1	1	1
41	17	2	1	4	2	1	1	1	2	1	1	1	1	3	1	1	1	1	4	2	7	7	5	5	4	4	4	4	4	2	3	3	3	3	2	3	4	3	4	4
42	16	2	1	3	1	1	1	1	1	1	1	1	1	1	1	1	1	1	6	5	6	6	6	6	5	5	6	5	5	6	3	3	4	3	2	3	3	4	4	3
43	17	1	2	3	3	2	1	2	2	2	2	1	2	4	1	1	1	2	7	7	6	7	7	6	6	7	7	7	4	4	3	3	3	3	2	3	3	3	3	3
44	16	1	2	3	3	2	1	1	1	1	1	1	1	3	1	1	1	1	5	7	5	4	4	5	5	3	7	5	5	5	3	3	3	3	2	3	3	3	4	3
45	16	1	2	3	3	2	2	1	1	1	1	1	1	2	1	1	1	1	1	6	3	6	7	6	6	6	6	6	7	5	3	3	3	3	3	3	3	3	3	2
46	16	2	1	2	5	2	2	1	2	1	3	1	1	1	1	3	1	5	4	1	3	4	4	6	2	6	7	4	2	7	3	2	1	3	1	2	2	2	1	3
47	16	2	1	2	3	3	3	1	1	3	2	1	1	1	1	1	1	1	4	5	6	6	4	4	5	3	6	7	2	6	3	3	3	3	1	3	2	2	2	3
48	16	1	2	2	3	1	1	1	1	5	1	2	1	1	1	2	2	1	7	7	6	7	7	5	4	6	5	7	7	5	3	3	3	3	2	3	3	2	3	3
49	16	1	2	2	2	1	2	2	1	2	2	1	1	3	3	2	2	2	5	3	4	3	3	3	2	3	4	3	4	4	2	2	2	2	2	3	3	3	2	3
50	17	1	2	3	2	3	2	2	1	1	2	2	1	1	1	1	1	1	6	7	6	7	7	6	5	7	6	6	7	5	4	3	3	4	2	3	3	3	3	3
51	17	1	1	2	3	3	2	2	3	2	3	2	3	3	2	3	2	2	2	3	3	3	2	3	3	3	3	3	3	3	3	3	3	3	2	2	2	2	2	3
52	16	1	2	2	2	1	1	1	1	1	1	1	1	1	1	1	1	2	5	5	4	7	7	5	4	7	5	7	7	4	3	3	3	3	2	2	3	4	4	3
53	16	2	1	2	1	1	1	1	2	1	2	1	2	3	1	1	1	2	2	1	5	5	3	3	6	4	7	4	4	6	3	2	2	3	2	2	3	3	3	4
54	16	2	1	4	2	2	2	2	2	1	2	1	2	3	1	1	1	1	5	5	5	7	6	7	7	6	7	7	6	7	3	1	1	3	1	2	2	1	1	4
55	16	1	1	3	3	1	2	1	2	1	2	1	1	1	1	1	1	1	6	5	4	3	4	2	2	6	4	1	4	3	3	3	3	3	1	2	3	2	3	3
56	17	1	2	3	5	2	4	3	3	2	5	4	2	4	3	2	2	5	6	7	4	4	5	5	6	5	7	7	5	7	3	4	4	3	3	3	4	4	4	4
57	17	2	2	3	1	1	2	1	1	1	1	1	2	4	1	1	1	2	4	7	4	7	7	4	4	4	7	4	4	4	3	3	1	4	2	2	3	2	1	4
58	17	1	2	3	3	2	3	3	2	3	3	1	3	3	1	3	1	4	3	4	4	7	6	5	4	4	2	6	3	3	3	3	2	3	2	2	2	2	3	3
59	16	1	1	4	2	1	1	1	3	2	2	3	1	1	1	1	1	1	7	5	6	7	5	3	3	3	5	5	3	3	3	3	3	3	2	3	3	4	4	3
60	16	2	2	1	1	1	1	1	1	1	1	1	1	1	1	1	1	1	6	5	7	6	5	5	2	6	3	5	4	5	4	4	3	4	3	4	4	3	4	4
61	18	2	2	2	3	2	1	1	2	2	2	1	1	2	1	1	1	2	6	6	6	6	6	6	6	5	5	5	5	5	3	4	3	3	3	3	3	4	4	3
62	18	2	1	4	4	1	1	1	1	1	1	1	1	3	1	1	2	1	5	6	6	6	6	3	4	7	3	6	5	5	3	3	2	3	2	3	3	2	2	3
63	16	2	1	2	5	5	5	4	1	5	5	5	5	1	1	5	1	1	2	3	5	5	5	3	4	6	4	6	1	3	2	1	1	3	1	1	2	2	2	4
64	16	2	2	2	2	1	1	1	2	1	2	2	2	2	1	1	1	1	6	5	6	7	5	5	4	4	4	3	5	5	3	3	3	3	2	2	3	3	4	3
65	16	2	1	2	1	2	3	1	2	5	3	3	3	4	2	1	1	1	5	6	5	4	6	5	4	7	6	7	6	6	3	3	2	2	2	3	2	3	3	3
66	18	2	1	4	2	1	2	1	2	1	2	1	2	1	1	1	1	1	3	4	5	6	5	5	4	4	5	3	3	5	2	3	3	3	2	3	3	3	3	2
67	16	2	1	4	2	1	3	1	2	1	2	5	1	1	1	1	1	1	3	2	3	3	4	6	6	2	6	4	5	6	2	2	3	3	2	3	3	4	4	3
68	16	2	1	3	1	1	1	1	2	2	1	1	2	1	1	1	1	1	6	7	7	5	6	7	3	4	6	6	6	7	3	4	3	3	2	4	3	3	4	3
69	16	1	1	3	3	1	1	1	2	1	1	1	1	3	1	1	1	1	3	5	4	4	5	6	4	3	5	4	3	4	2	2	3	2	2	3	4	4	3	3
70	17	1	2	3	3	3	1	3	3	3	2	1	3	4	1	2	4	4	3	6	5	1	4	5	5	2	5	5	3	6	3	2	3	3	1	3	3	3	4	3
71	17	2	1	3	2	2	2	1	1	1	1	1	2	4	1	3	4	2	5	4	6	5	5	5	5	3	5	4	3	4	3	3	3	3	2	3	2	3	3	3
72	17	2	2	3	2	1	2	2	2	1	2	1	2	3	1	1	1	1	4	5	6	6	6	6	5	6	6	6	6	6	3	3	3	3	3	3	3	3	4	4
74	17	1	2	3	3	1	1	1	2	1	1	1	1	1	1	1	1	1	5	5	7	7	7	6	6	7	7	7	7	7	3	3	3	3	2	2	2	2	2	4
75	17	2	1	3	4	1	5	1	1	1	2	1	2	4	1	5	1	5	3	3	3	2	2	4	3	1	5	2	2	5	4	3	3	3	3	3	3	3	4	4
76	16	1	2	4	1	1	1	2	2	1	2	1	1	1	2	1	1	1	4	5	6	6	6	4	4	6	4	6	6	4	3	3	3	3	3	3	3	3	3	3
77	16	1	2	2	1	2	1	2	3	2	2	1	2	2	2	1	1	2	4	4	4	3	4	4	4	4	4	7	4	3	3	2	2	3	3	2	3	3	3	3
78	15	1	2	3	3	2	3	1	2	1	2	1	1	3	1	2	1	1	6	4	6	6	6	3	4	5	7	6	5	5	3	3	1	3	1	3	3	1	2	3
79	16	1	2	3	1	2	2	1	2	1	2	1	1	1	1	1	1	1	4	3	3	3	5	4	2	2	5	1	4	5	3	3	3	2	2	2	2	3	3	4
80	16	1	1	4	3	3	3	1	2	4	3	2	2	3	1	1	2	3	5	6	6	6	6	6	6	6	6	6	4	6	3	3	3	3	3	3	3	3	3	3
81	16	2	1	2	2	1	1	1	2	1	2	1	1	2	1	1	1	1	6	7	7	6	5	5	7	4	6	4	6	6	2	2	3	2	2	2	3	3	3	3
82	15	2	2	2	4	2	1	2	3	1	2	2	1	1	1	1	1	1	3	5	5	6	4	3	4	3	3	5	4	4	3	2	3	3	3	2	2	3	3	3
83	16	1	2	2	4	2	2	2	3	3	2	1	1	3	1	1	2	1	3	3	4	4	5	2	3	5	4	3	5	4	3	3	2	2	1	2	2	4	4	4
84	16	1	1	2	3	2	3	2	3	3	2	1	1	1	4	1	2	1	3	3	4	4	5	2	3	5	4	3	5	4	3	3	2	2	1	2	2	4	4	4
85	17	1	2	3	5	4	4	4	2	5	3	1	1	1	1	3	1	1	2	1	5	6	3	3	2	2	3	2	2	2	3	2	2	2	2	3	1	2	2	2
86	16	1	1	3	2	2	2	1	2	1	1	1	1	4	1	1	2	1	7	7	7	7	7	7	7	7	7	7	7	7	4	4	1	4	1	4	4	1	1	4
87	16	1	2	3	2	1	2	1	2	1	1	1	1	1	1	3	2	1	6	6	6	6	5	5	4	5	5	5	5	5	3	3	2	4	1	3	3	2	2	3
88	18	2	2	4	4	2	2	2	3	2	2	2	3	3	2	2	2	1	5	4	4	4	4	4	4	4	4	4	4	4	3	3	2	3	2	3	3	2	2	3
89	15	2	2	2	1	3	1	1	2	2	2	1	1	1	1	1	1	4	3	4	3	3	3	5	4	2	5	3	2	3	3	2	2	2	2	3	3	3	3	3
90	16	2	2	2	2	1	1	1	1	1	1	2	1	1	1	1	1	1	7	7	6	7	7	7	6	4	5	5	6	7	2	3	4	3	3	3	4	4	4	4
91	16	2	2	4	3	3	3	3	3	1	3	3	3	3	1	1	1	3	4	4	4	4	4	4	4	4	5	5	4	5	1	3	2	3	2	3	3	3	3	4
92	17	2	2	3	3	2	3	4	2	2	2	1	1	3	1	5	2	5	6	3	3	2	4	5	5	2	4	3	2	3	3	3	3	3	3	3	2	2	2	3
93	16	2	2	4	3	1	1	2	2	1	4	1	1	3	1	1	1	1	2	1	7	6	5	3	2	3	2	1	4	2	4	4	3	4	4	4	3	4	4	3
94	16	2	2	1	2	1	1	1	2	5	2	1	1	1	1	1	1	1	4	4	4	4	4	4	4	4	4	4	4	4	3	3	2	3	2	3	3	4	4	3
95	16	2	1	2	5	5	5	2	5	1	4	5	3	3	1	1	1	5	3	6	4	2	7	6	6	2	7	7	2	5	2	3	1	2	2	2	1	3	1	3
96	16	1	2	3	4	1	2	2	2	2	2	1	1	2	1	1	1	2	4	4	6	4	6	4	2	3	4	5	4	5	3	2	3	3	3	3	3	4	3	3
97	15	2	1	2	2	1	2	1	1	1	1	1	1	1	1	1	1	1	5	4	4	4	4	4	4	4	4	4	4	4	3	3	2	3	2	3	3	4	4	3
98	17	1	2	4	2	2	1	1	3	1	2	1	1	1	1	1	1	1	6	7	7	7	7	6	5	6	7	7	5	4	4	3	3	4	1	4	4	3	3	4
99	16	2	2	4	1	2	2	1	1	1	2	1	2	3	1	1	1	1	7	7	7	7	6	4	3	5	6	7	5	7	3	3	3	4	3	3	3	1	2	4
100	16	2	2	3	2	1	1	3	3	5	3	1	1	1	1	1	1	4	5	5	4	5	5	7	7	6	7	7	7	7	3	3	2	2	2	2	2	2	2	3
1	18	1	2	3	2	3	1	2	3	1	1	1	2	2	1	1	1	1	5	5	6	6	6	5	4	4	4	5	4	4	3	3	3	2	2	3	2	2	1	3
2	17	1	2	3	1	1	1	1	1	1	1	1	1	1	1	1	1	1	4	7	5	7	6	4	4	5	5	6	4	6	3	2	3	3	2	3	3	3	4	3
3	18	2	2	1	1	2	1	3	1	1	1	1	1	1	1	1	1	1	4	4	4	4	4	6	6	6	6	6	6	6	4	4	1	4	1	4	4	1	1	4
4	17	1	2	2	3	1	1	1	1	1	1	1	1	1	1	1	1	1	3	6	5	4	3	3	3	4	5	5	3	6	2	2	4	3	2	3	2	4	4	3
5	16	1	2	2	3	1	2	1	2	1	1	1	1	1	1	1	1	1	4	4	5	4	4	4	4	4	5	5	5	4	3	2	2	2	2	2	2	2	2	3
6	17	1	2	1	4	2	3	3	3	3	2	3	1	2	2	2	3	3	6	6	6	5	6	6	5	5	6	6	6	6	3	3	3	3	2	3	3	2	3	3
7	17	2	2	2	5	1	1	1	1	1	1	1	1	4	1	1	1	4	6	6	6	6	6	6	6	6	6	6	6	6	4	3	3	3	2	3	3	2	2	3
8	18	1	2	2	1	2	1	1	1	1	1	2	1	3	1	1	1	1	5	5	5	5	5	3	6	6	6	7	2	2	1	1	4	1	4	1	1	4	4	1
9	17	1	2	2	3	2	1	1	1	1	1	1	1	1	1	2	1	2	5	4	6	6	6	4	4	6	4	4	5	5	3	2	2	2	2	3	3	3	2	3
10	17	2	2	4	3	4	1	2	1	5	3	2	1	2	1	1	2	3	4	7	7	7	6	6	6	7	5	5	7	6	3	3	2	3	1	2	2	3	3	4
11	17	2	1	3	5	3	5	5	3	5	3	5	1	4	1	4	1	5	4	3	3	3	4	3	5	2	3	3	4	3	2	3	2	3	2	3	3	2	2	3
12	17	2	2	3	2	3	2	4	1	1	2	1	1	1	1	1	1	1	1	2	3	1	2	1	2	3	4	2	1	2	4	4	2	4	2	4	3	1	2	4
13	18	2	2	2	1	3	3	2	1	1	2	1	1	1	1	1	1	2	1	2	1	1	1	2	1	1	2	1	2	2	4	3	2	4	1	4	3	1	1	3
14	17	2	2	3	3	3	1	1	3	1	2	1	1	3	2	1	1	1	2	2	5	5	5	5	5	5	5	1	2	2	4	3	2	4	1	4	3	1	1	3
15	17	2	2	4	2	3	1	3	1	2	2	2	1	3	1	3	4	1	6	4	5	5	5	6	5	1	6	7	6	3	3	3	3	3	2	3	2	3	2	3
16	17	2	2	3	3	1	3	1	1	1	1	1	2	1	1	1	1	3	4	5	5	5	5	6	6	7	7	5	5	6	3	3	3	3	3	3	4	4	4	4
17	16	2	1	4	3	2	2	1	2	1	2	2	2	3	1	1	1	1	6	6	6	6	6	7	7	7	7	7	5	7	4	3	3	3	2	4	3	3	3	4
18	17	2	1	3	3	1	1	1	1	1	1	1	1	3	3	1	1	1	1	6	3	3	6	3	3	3	6	6	6	6	4	4	1	4	1	4	4	1	1	4
19	17	2	2	1	3	1	1	1	2	1	2	1	1	4	1	1	1	3	7	4	7	7	4	6	6	7	6	6	4	6	3	3	4	3	3	3	3	4	4	4
20	17	1	1	3	2	1	1	2	1	2	2	1	1	1	1	2	1	1	7	7	7	7	7	7	7	7	7	7	7	7	3	3	2	3	2	3	3	2	2	3
21	18	2	2	2	3	3	3	1	3	3	3	2	1	1	1	1	1	5	4	4	3	4	4	4	4	3	4	4	3	3	3	3	3	3	2	3	3	3	3	3
22	16	2	2	3	1	1	1	1	1	1	2	1	1	1	1	1	1	1	6	7	7	7	7	5	6	7	7	7	6	6	4	4	4	4	4	4	4	4	4	4
23	18	2	1	2	5	2	1	1	2	1	2	1	1	2	2	1	1	1	4	1	6	7	7	4	2	1	3	7	7	5	3	2	2	4	1	3	2	2	3	4
24	18	2	2	3	3	3	2	1	3	3	3	3	2	2	1	3	1	3	7	6	5	4	3	2	1	2	3	2	2	3	4	3	3	1	3	3	2	3	2	3
25	16	2	2	4	1	1	2	1	2	2	1	1	1	2	1	1	1	1	6	5	7	7	6	6	5	6	7	7	6	6	2	2	2	2	3	2	2	3	3	2
26	17	2	2	3	2	1	1	1	1	1	2	1	2	2	1	1	1	2	7	7	6	7	7	6	6	6	6	7	6	6	3	3	3	3	3	3	3	3	3	3
27	19	2	2	2	3	1	1	3	2	2	1	3	1	2	1	1	1	1	5	6	4	4	5	7	5	6	6	6	5	6	3	3	3	3	1	2	3	3	2	4
28	18	2	2	4	4	3	2	2	2	2	2	2	1	1	1	2	2	2	2	2	2	2	2	2	2	2	2	2	2	2	3	3	2	3	2	3	3	2	2	3
29	17	2	2	3	5	5	5	1	3	1	2	1	2	2	1	5	1	5	1	1	2	2	2	4	5	1	7	3	1	7	3	2	3	3	2	3	2	3	3	4
30	17	1	1	2	5	4	2	2	3	1	2	2	2	3	1	2	1	5	1	1	1	1	1	4	4	1	3	1	3	4	3	3	3	3	2	3	3	3	3	3
31	16	1	2	2	3	2	1	2	3	3	2	1	2	2	1	1	1	1	3	3	4	5	6	4	4	4	4	4	4	4	3	3	2	3	1	3	3	2	2	3
32	17	2	2	3	2	1	1	1	1	1	1	1	1	1	1	1	1	1	4	6	7	7	7	4	4	7	7	7	7	7	3	3	2	3	2	3	3	2	2	3
33	17	2	1	2	1	1	2	1	2	1	1	1	1	3	2	2	1	1	6	7	6	7	6	5	4	4	5	6	6	5	3	3	3	3	3	3	3	3	3	3
34	16	1	2	2	1	1	1	1	1	1	1	1	1	3	1	1	1	3	3	3	6	6	7	6	7	5	7	7	1	7	3	2	3	3	2	3	3	4	4	3
35	17	2	2	2	4	2	3	2	1	2	2	2	1	3	3	1	2	5	2	3	4	4	3	3	4	3	4	3	4	3	3	3	3	1	4	3	1	3	3	1
36	17	2	2	4	1	1	1	1	1	1	3	2	1	1	1	1	1	3	2	2	3	3	2	1	2	2	2	4	3	5	2	3	2	4	2	4	3	1	2	4
37	17	2	2	3	3	3	2	1	3	3	2	1	2	2	5	1	1	1	1	2	5	3	1	5	2	3	3	4	3	1	3	4	1	1	2	4	3	1	1	3
38	17	2	2	2	1	1	1	1	2	1	1	1	1	1	1	1	1	1	7	5	7	7	7	6	6	7	7	7	1	7	3	3	3	4	3	3	3	4	4	4
39	18	2	1	1	2	2	2	2	1	1	2	1	1	1	1	2	1	1	4	4	5	5	4	5	5	4	5	4	4	5	3	2	2	3	2	2	2	3	3	2
40	16	2	1	3	5	5	3	4	3	4	5	2	4	4	3	3	4	3	2	3	4	5	6	7	1	4	5	2	5	6	4	3	3	1	4	2	3	2	3	4
41	17	2	2	3	3	4	2	3	1	3	3	3	1	3	1	1	3	2	1	2	2	2	1	6	6	5	5	4	5	4	4	3	2	4	2	2	3	3	2	2
42	17	2	1	4	1	1	1	1	1	1	1	1	1	1	1	1	1	1	5	1	3	4	1	4	4	1	1	3	1	1	4	4	3	4	3	4	3	4	4	4
44	18	2	2	3	2	1	1	1	2	4	1	1	1	2	1	1	1	1	3	3	4	4	3	3	3	3	4	2	2	2	2	2	3	3	2	2	2	3	3	3
45	17	2	2	2	2	2	1	1	1	1	2	1	1	1	1	1	1	1	6	3	4	4	4	4	4	5	4	3	3	3	3	3	3	3	3	2	3	3	3	3
46	16	1	2	1	4	3	4	2	3	2	2	4	3	1	1	2	1	2	4	4	3	4	4	4	4	4	4	4	4	4	3	3	3	2	2	3	3	3	3	2
47	15	2	2	3	3	2	4	3	2	3	2	3	1	1	1	1	1	1	3	3	5	5	1	3	3	3	3	3	4	3	4	3	3	4	2	3	3	2	2	3
48	18	2	2	3	2	1	2	1	1	2	2	1	1	2	1	1	1	1	3	3	3	3	3	2	2	3	3	3	3	3	3	4	3	4	3	4	3	3	3	3
49	18	1	2	2	1	2	2	1	1	1	1	1	4	1	1	1	1	1	6	6	6	6	6	6	6	6	6	6	6	6	3	2	3	3	2	3	3	3	3	3
50	17	2	1	1	3	3	2	2	3	2	3	3	2	2	1	1	3	3	4	3	4	4	4	4	4	3	4	4	3	4	4	3	3	4	2	3	2	4	4	3
51	17	1	2	2	2	2	1	1	1	2	2	2	1	2	1	1	2	1	6	6	6	6	5	5	4	6	6	6	5	5	3	3	3	3	2	2	2	2	2	3
52	16	2	2	4	2	2	1	1	2	2	3	1	1	3	1	2	2	2	5	3	6	6	6	6	6	6	2	6	6	5	3	3	3	3	3	3	3	3	3	4
53	17	2	1	2	1	1	1	1	1	4	1	1	1	1	1	1	1	1	4	4	4	4	4	3	1	3	1	7	1	7	3	2	1	4	1	2	2	1	1	2
54	17	2	2	4	5	5	5	5	5	5	5	1	5	5	1	1	5	5	7	3	3	3	7	4	1	7	7	1	7	2	2	4	1	4	3	2	4	1	1	4
55	17	2	2	3	2	1	1	2	2	1	1	1	1	2	1	2	1	1	6	6	7	7	7	6	6	7	6	6	5	5	3	3	3	2	2	3	3	3	4	3
56	18	2	2	3	2	3	3	1	2	3	1	1	2	2	1	1	1	1	5	5	5	5	5	5	5	5	5	5	5	5	3	3	2	3	2	3	3	2	2	3
57	18	2	2	3	3	1	3	3	1	1	1	1	3	1	1	3	1	4	4	4	4	4	4	4	6	6	6	5	5	5	4	4	4	4	4	4	4	4	4	4
58	17	2	2	4	3	2	2	1	2	1	1	1	1	2	1	1	1	1	4	2	2	2	2	2	2	2	2	2	1	1	2	3	2	2	2	3	3	3	3	4
59	17	2	2	2	3	5	3	1	1	3	3	3	2	1	1	1	1	1	4	3	2	3	4	3	4	3	4	3	4	3	3	2	3	3	1	3	4	1	2	3
60	17	1	2	2	3	1	2	1	1	1	1	1	1	1	1	1	1	1	4	6	6	6	6	5	4	6	6	6	4	4	4	3	3	4	3	3	3	3	3	3
61	17	2	2	3	3	1	3	2	2	3	3	1	1	1	1	1	1	1	5	3	5	5	4	4	4	3	4	4	4	3	3	2	2	3	2	3	3	2	3	3
62	16	1	1	1	2	1	2	1	2	5	2	1	1	1	1	1	1	1	7	3	5	3	6	5	4	2	3	6	4	4	4	4	4	3	3	3	4	4	2	4
63	16	1	2	2	3	1	2	1	2	3	2	3	1	2	1	3	2	3	3	3	4	5	4	6	3	1	4	5	4	4	3	3	3	3	3	3	3	3	3	3
64	16	1	2	2	3	3	2	1	1	2	3	1	1	1	1	1	2	1	4	6	4	3	6	6	7	3	7	4	2	6	2	2	1	2	1	2	2	2	2	3
66	16	2	2	1	1	4	3	3	2	2	3	4	1	2	1	3	3	2	1	2	2	1	3	5	7	7	4	1	2	3	3	3	2	2	2	2	1	3	4	3
67	17	1	1	1	1	1	1	1	1	1	2	1	1	3	1	1	2	1	3	4	3	4	6	5	3	2	4	1	2	3	3	3	3	3	2	3	3	3	4	4
68	17	2	2	2	1	1	1	2	1	1	1	1	1	1	1	4	1	4	7	4	7	1	7	3	1	3	4	1	5	5	2	4	3	3	2	3	3	3	3	3
70	16	1	2	4	3	4	3	3	3	2	3	1	2	2	1	2	1	1	4	2	3	4	4	4	3	3	3	3	3	3	3	3	2	3	2	3	3	2	2	22
71	15	2	1	1	5	5	2	5	5	1	5	5	5	5	5	5	5	5	1	1	1	1	1	1	1	1	1	1	1	1	1	1	1	1	1	1	1	1	1	1
72	15	1	2	3	5	1	2	1	1	1	2	1	1	4	1	2	1	1	3	4	5	7	6	3	1	7	3	5	7	6	4	3	3	3	3	2	3	3	3	3
73	17	1	2	2	3	2	2	1	3	3	2	3	2	2	1	1	3	1	4	3	3	3	4	4	4	3	4	4	3	4	3	2	3	3	2	2	2	2	3	2
74	16	2	2	2	4	1	1	1	4	3	1	5	5	5	5	1	5	5	6	6	6	5	6	7	7	1	7	5	5	7	3	3	4	4	4	4	4	4	4	3
75	17	2	1	2	3	3	3	1	2	1	2	1	2	1	1	1	1	1	3	2	3	3	2	2	1	2	2	4	3	1	2	2	2	3	3	4	2	1	2	3
77	16	1	2	1	2	2	1	1	2	3	2	1	1	3	2	1	1	2	5	5	3	3	5	7	7	5	7	7	5	7	3	3	2	2	2	2	3	3	3	3
78	17	2	2	3	3	3	2	3	3	2	3	3	2	1	1	2	1	1	3	3	4	4	5	5	5	6	5	6	4	5	3	3	3	3	2	3	3	3	3	3
79	17	2	1	3	3	3	2	3	3	1	1	2	2	4	2	1	3	4	5	5	7	6	6	6	7	5	6	5	6	5	3	2	3	3	2	3	3	3	3	3
80	17	1	2	3	2	1	1	1	1	3	1	1	1	1	1	1	1	1	6	6	5	5	6	4	6	5	6	5	6	6	3	3	2	3	2	3	3	3	4	3
81	17	2	2	4	2	2	2	1	1	2	2	1	1	3	1	1	1	1	5	7	6	6	6	6	7	6	7	6	5	6	2	2	3	3	3	3	2	3	3	2
82	16	1	2	2	2	2	2	1	1	1	1	1	1	1	1	1	1	1	5	6	6	6	6	6	6	6	5	6	5	5	3	3	2	3	2	3	3	3	3	3
83	18	1	2	2	1	1	1	1	1	1	1	1	1	1	1	1	1	1	6	6	5	7	7	7	7	7	7	6	6	6	3	3	3	3	3	3	3	3	3	3
84	17	2	1	4	3	2	2	1	1	1	2	1	1	4	1	2	1	1	3	3	3	2	3	4	6	3	4	2	3	3	3	2	3	3	2	3	3	3	3	3
85	17	1	2	2	1	1	1	1	1	1	1	1	1	1	1	1	1	1	3	4	4	6	7	6	6	7	6	6	5	6	3	3	3	3	2	3	3	2	2	3
86	19	2	2	2	4	3	4	2	2	3	2	1	1	3	2	1	2	3	3	3	4	3	5	6	4	4	2	3	2	4	3	2	2	3	3	3	2	2	1	2
87	19	1	2	1	1	2	1	2	1	1	1	1	2	1	1	1	1	2	3	6	6	6	6	6	3	5	3	1	3	2	4	4	3	3	3	4	3	3	2	4
88	16	1	1	4	2	2	1	1	2	1	2	2	2	3	2	1	1	1	6	5	6	3	5	4	4	5	6	5	7	4	3	3	3	3	3	3	3	3	3	3
89	18	1	2	3	2	1	2	1	1	3	2	1	1	1	1	1	1	1	5	5	6	6	4	5	4	5	6	5	5	2	3	2	2	2	2	3	3	3	3	2
90	17	1	2	3	3	1	2	1	2	1	2	1	1	1	1	1	1	1	3	4	5	5	6	4	4	6	3	5	4	4	3	4	2	3	2	3	3	3	2	4
91	18	1	2	2	3	2	1	1	1	1	1	1	2	3	1	3	1	2	7	7	7	7	6	6	6	6	6	7	7	7	3	3	3	3	3	3	3	3	3	3
92	16	1	2	3	2	2	2	1	2	1	2	1	1	3	1	1	1	1	3	4	7	7	5	4	2	3	5	5	4	5	2	2	2	3	2	3	2	2	3	3
94	16	1	2	3	4	5	5	4	4	3	4	5	2	3	4	2	4	3	3	6	3	4	3	3	3	4	4	6	2	5	2	2	2	3	2	3	2	3	3	3
95	19	2	2	4	4	2	3	2	3	3	2	1	1	2	1	1	1	1	4	5	6	4	5	3	4	3	4	1	2	2	3	3	3	3	2	2	2	3	3	2
96	18	1	2	1	2	1	1	1	1	1	1	1	1	1	1	1	1	1	6	6	6	6	6	6	6	6	6	6	4	6	3	3	3	3	2	2	3	2	2	3
97	19	1	2	2	4	1	3	1	2	4	1	1	1	2	1	1	1	1	5	5	5	5	5	5	2	2	5	5	2	5	2	2	3	2	2	2	2	3	3	3
98	17	1	1	1	2	2	1	1	2	1	2	1	1	1	1	1	1	1	6	5	5	6	4	4	3	4	4	5	3	5	3	3	2	3	2	3	3	2	2	4
99	17	1	2	3	4	3	3	2	3	1	3	1	1	1	1	1	1	1	4	4	2	5	4	3	3	4	4	4	3	4	3	3	2	3	2	2	3	1	1	3
100	17	1	2	3	3	1	1	1	2	1	1	1	1	1	1	2	1	1	5	5	5	6	6	5	5	5	5	6	6	6	3	2	2	3	2	3	2	2	2	3
1	19	1	2	2	1	1	1	1	1	1	1	1	1	2	1	2	1	1	3	5	5	5	5	4	3	3	4	4	4	5	2	2	2	3	2	2	2	3	3	3
2	16	2	2	2	2	1	2	1	1	1	1	1	2	2	1	1	1	1	5	5	5	5	4	6	4	4	6	5	4	5	3	3	2	3	2	3	3	3	3	3
3	17	2	2	2	1	1	1	1	1	1	1	1	3	1	1	1	1	1	7	6	6	6	6	4	4	5	4	6	6	3	3	3	3	2	2	3	3	3	3	3
4	17	2	1	1	5	5	5	5	4	5	5	2	5	3	1	5	2	3	3	3	3	5	1	5	5	3	5	6	3	5	3	3	2	3	2	3	3	2	2	3
5	17	2	1	2	3	3	2	2	2	3	2	2	2	3	1	1	1	3	5	6	6	5	7	7	6	5	3	4	6	2	3	3	2	3	1	4	4	3	3	2
6	17	2	2	1	3	1	1	1	2	1	1	1	1	3	1	3	5	4	4	4	4	7	7	5	5	6	6	7	1	4	3	3	3	3	3	3	3	4	4	3
7	16	2	2	4	3	4	3	2	1	1	2	1	1	1	1	1	1	1	7	7	5	4	7	7	7	3	7	7	6	7	3	3	2	3	2	3	4	4	4	3
8	15	2	2	3	5	4	1	3	2	1	2	1	3	4	1	1	1	5	7	7	5	4	7	7	7	3	7	7	6	7	3	3	2	3	2	3	2	2	3	4
1	18	2	1	3	2	1	1	1	2	1	1	1	1	3	1	1	2	3	4	4	5	5	5	4	4	4	5	4	4	5	3	3	2	3	2	3	2	4	4	3
	18	2	1	4	3	3	2	2	3	2	3	1	2	4	1	2	2	2	5	5	6	4	4	5	5	4	5	7	3	7	3	3	3	3	3	3	3	3	3	3
2	17	2	2	4	3	2	2	2	3	1	2	1	1	1	1	1	1	1	3	3	4	4	4	5	4	4	4	3	4	4	2	3	3	3	2	3	3	2	3	3
3	17	2	1	3	2	2	2	2	2	2	2	1	1	1	1	1	1	1	3	4	5	6	5	5	4	4	5	2	3	5	2	3	3	3	2	3	3	3	3	2
4	18	2	2	4	3	1	2	1	3	1	1	2	1	1	1	1	1	1	2	3	4	3	3	2	2	3	3	1	3	1	3	3	3	3	3	3	3	2	3	3
51	17	1	2	3	3	1	2	1	3	1	2	2	2	1	3	1	1	1	5	6	4	4	5	4	4	5	5	5	5	6	3	2	3	3	2	3	2	3	3	3
52	18	1	2	1	3	2	2	2	3	5	2	2	3	2	2	2	2	4	3	5	5	6	7	6	5	6	6	4	5	6	3	3	2	3	2	2	2	3	2	3
53	17	1	2	1	2	1	2	1	1	5	1	1	1	2	1	1	1	1	6	6	6	6	6	6	4	4	7	3	4	6	3	3	4	3	2	2	2	4	4	4
55	16	1	1	3	1	2	1	1	2	1	2	1	1	3	1	1	1	1	6	6	6	6	6	5	6	6	6	6	6	6	3	3	4	3	4	3	3	3	4	3
56	17	1	2	2	4	1	2	2	2	3	1	1	1	2	1	1	2	3	5	4	3	3	7	7	7	3	6	7	5	6	3	3	3	3	3	3	3	3	2	3
57	18	2	2	3	2	1	1	1	1	1	1	1	1	1	1	1	1	1	3	4	5	4	7	4	6	5	4	4	5	5	3	3	2	2	2	3	3	1	1	4
58	17	1	1	3	3	1	1	1	2	1	2	1	1	1	1	1	1	1	6	5	6	7	7	6	6	6	6	7	6	6	3	3	3	3	2	3	3	3	3	3
59	17	2	2	4	3	5	5	1	2	3	2	5	1	1	1	1	1	1	3	4	4	4	3	4	4	4	4	3	3	3	3	3	2	3	2	3	3	2	2	3
60	18	1	2	1	2	2	1	1	1	1	2	1	1	2	1	3	2	1	3	3	3	5	5	5	5	5	5	5	5	5	3	3	2	3	2	3	3	2	2	3
61	18	1	1	2	3	1	3	1	2	1	2	1	2	2	1	1	1	1	5	5	5	5	6	5	5	5	5	7	6	6	3	3	3	3	2	3	3	2	2	3
62	18	2	1	2	4	1	4	1	3	1	1	2	1	1	2	2	1	1	2	3	2	2	2	2	3	4	4	4	1	2	2	3	2	3	2	2	3	3	3	3
63	16	2	2	4	2	1	1	1	2	1	2	1	1	1	1	1	1	1	4	4	7	4	4	4	4	4	4	4	4	4	3	3	3	3	2	3	3	4	4	3
64	16	1	2	3	3	1	2	1	1	2	2	1	1	2	1	2	1	1	1	1	4	4	1	3	3	3	3	3	7	3	3	2	3	4	3	3	3	3	4	3
65	16	1	2	3	3	3	1	1	2	2	2	1	1	3	1	3	1	1	5	6	5	5	7	6	6	5	7	6	5	6	3	3	3	2	2	3	3	3	3	3
66	16	1	2	3	4	3	2	3	2	1	3	1	2	3	1	1	1	1	4	6	4	3	6	6	6	4	6	6	3	6	3	3	3	3	2	3	3	3	3	4
68	17	1	1	2	2	2	2	2	2	1	2	1	1	1	1	1	1	1	4	4	5	5	4	4	5	3	5	3	5	4	3	3	3	3	2	3	3	3	3	3
69	18	1	2	2	5	2	2	1	2	5	2	1	2	2	1	2	2	1	4	3	3	3	3	3	3	3	3	2	3	2	3	3	3	3	2	3	2	3	2	4
70	17	1	2	1	3	2	1	1	1	1	1	1	1	1	1	1	2	1	5	5	5	6	6	5	5	6	5	5	4	5	3	3	3	3	2	3	3	3	2	3
71	17	2	2	3	3	1	2	2	3	1	2	1	2	3	1	1	1	1	5	6	6	6	6	6	6	6	6	6	6	6	3	3	3	2	2	3	3	3	3	3
72	18	2	2	4	2	1	2	1	2	1	2	1	1	3	1	1	1	2	3	3	6	6	6	5	4	3	5	4	7	5	3	2	3	3	2	3	2	3	3	3
73	18	2	2	3	4	3	4	2	4	1	1	2	1	2	1	2	2	1	4	6	2	4	5	4	4	6	5	4	6	7	3	3	2	2	3	3	3	1	3	4
74	16	1	2	1	2	2	2	2	3	3	2	2	2	2	2	2	1	2	3	2	3	3	3	4	2	3	5	3	4	5	2	1	2	2	2	2	2	2	2	3
75	16	1	2	4	4	3	1	1	3	1	2	1	1	1	2	1	1	1	5	5	6	7	7	4	3	6	5	6	6	6	3	3	3	3	2	2	2	2	3	3
76	16	1	2	4	2	2	1	1	2	2	2	1	2	2	1	1	3	1	4	3	6	6	5	4	5	5	4	4	5	5	3	2	3	3	2	3	3	3	3	3
77	17	1	1	2	3	1	1	1	2	1	2	2	2	3	2	1	3	3	3	7	6	5	3	5	3	4	6	7	5	2	3	2	2	4	2	2	3	3	3	4
78	16	1	1	3	3	1	1	1	3	5	2	1	1	5	1	5	1	5	6	6	5	5	7	4	4	3	5	7	5	5	3	3	1	4	1	4	3	2	2	3
79	15	1	2	3	4	1	3	2	3	1	3	3	1	3	1	1	1	2	5	5	5	3	5	5	5	3	6	4	3	5	2	2	3	3	2	3	3	3	2	3
80	17	2	1	4	1	1	1	1	1	5	1	1	1	1	1	1	1	1	6	6	6	6	4	4	5	5	6	6	6	6	4	3	3	4	2	3	3	4	4	3
81	17	1	2	3	4	2	2	2	2	2	3	2	3	4	2	1	3	2	3	5	4	4	5	4	5	3	7	4	4	5	3	1	2	2	2	2	2	2	2	3
82	18	2	2	3	2	1	1	1	1	1	2	1	2	1	1	1	1	1	6	6	6	6	4	4	5	5	6	6	6	6	4	3	3	4	2	3	3	3	3	3
83	17	1	2	3	2	1	2	1	2	2	2	1	1	2	1	1	1	1	3	4	2	5	3	4	5	3	5	2	1	5	4	3	4	3	3	3	3	4	4	3
84	17	1	2	3	2	2	1	1	2	1	1	1	1	1	1	2	1	1	1	6	3	6	7	4	4	7	7	6	5	7	4	3	4	4	3	4	3	3	4	3
85	17	2	2	3	1	3	3	3	1	3	1	3	1	3	1	3	1	5	7	7	5	4	5	6	5	7	6	6	6	6	4	4	3	3	3	3	3	3	4	4
86	18	2	2	2	5	5	3	4	3	3	3	1	1	1	1	5	1	1	4	4	4	4	4	4	4	4	4	6	4	4	2	2	2	2	2	2	2	2	2	2
87	17	2	2	3	3	4	1	1	3	1	2	2	1	1	1	1	1	1	6	6	6	6	5	5	3	5	4	5	4	5	3	2	4	3	2	3	2	2	3	2
88	19	1	2	1	3	2	4	5	3	1	2	3	4	4	1	2	3	5	4	3	4	2	3	5	2	1	4	7	4	5	3	2	2	4	3	1	1	1	3	2
89	17	1	2	2	1	1	1	1	1	1	1	1	1	2	2	1	1	1	1	1	1	1	1	1	1	1	1	1	1	1	4	4	1	3	2	3	3	2	2	3
90	16	1	2	4	5	3	1	1	2	5	2	1	1	1	1	1	1	1	4	7	5	4	4	4	4	4	5	5	6	4	4	2	2	3	2	2	2	2	2	3
91	16	1	2	3	3	1	1	1	1	1	1	1	1	2	1	2	2	2	7	7	7	7	6	7	6	7	7	7	7	7	3	3	3	3	1	3	3	3	3	3
92	18	1	2	2	3	3	1	2	2	1	2	1	2	1	2	1	1	1	3	6	6	6	7	6	5	7	4	7	7	7	3	3	3	4	3	4	4	3	3	3
93	17	1	2	2	1	1	3	1	1	1	1	1	1	1	1	1	1	1	7	7	7	7	6	2	3	7	4	7	7	4	4	3	4	4	1	4	4	4	4	4
94	18	2	2	1	1	1	1	1	1	1	1	1	1	1	1	1	1	1	3	3	3	3	4	2	3	4	2	3	2	3	3	3	1	3	2	2	2	2	2	3
95	17	2	2	3	3	3	2	2	3	1	2	2	2	4	1	1	2	1	7	7	5	5	7	7	7	4	7	7	6	5	2	2	1	2	2	1	2	3	1	4
96	17	2	2	4	2	2	1	1	2	1	2	1	1	2	2	1	2	1	6	6	6	6	6	6	6	6	6	6	6	6	3	3	2	3	2	2	2	3	2	3
97	17	1	2	1	3	5	2	2	2	2	2	1	2	4	1	2	2	2	4	4	7	4	1	1	1	4	4	1	4	4	2	1	2	2	2	2	2	2	2	3
98	16	1	1	1	5	1	1	1	5	1	2	1	1	5	1	5	2	1	7	7	7	7	7	7	5	7	7	7	7	7	3	3	2	3	2	2	3	3	2	3
99	17	1	2	2	1	1	1	1	1	1	1	1	1	1	1	1	1	1	5	7	4	5	6	5	4	6	4	7	4	4	3	3	3	3	3	3	3	4	4	4
100	16	1	2	2	2	3	2	3	2	2	2	1	1	2	1	3	1	5	4	4	4	4	4	4	4	4	4	4	4	4	3	3	2	3	2	3	3	2	2	3
1	18	1	2	4	2	3	3	2	2	1	2	1	1	2	1	1	1	1	6	6	6	6	6	5	6	5	7	5	6	6	3	2	3	3	2	3	2	3	3	3
2	17	1	2	1	1	1	1	1	1	1	1	1	2	1	1	1	1	1	5	5	5	6	6	6	5	5	6	6	6	6	3	2	2	3	3	3	3	3	3	3
3	17	2	2	2	4	3	2	2	2	3	2	1	2	3	1	2	2	2	3	3	3	3	3	3	3	3	3	3	3	4	3	2	2	2	2	2	2	3	3	3
4	17	1	2	4	2	2	2	1	1	1	2	1	1	2	2	2	1	1	3	3	3	6	5	5	5	4	4	6	6	5	3	3	3	3	2	3	3	4	4	3
5	18	2	2	2	3	2	1	1	2	5	1	1	1	1	1	2	3	5	5	4	1	2	3	2	2	7	3	7	1	7	2	3	4	3	4	3	2	2	4	2
6	17	2	1	4	3	2	2	1	3	1	1	1	1	1	1	1	1	1	5	6	4	3	5	1	2	3	4	2	1	1	4	4	1	4	1	2	3	1	2	3
7	17	2	2	2	3	2	2	1	2	2	2	1	2	1	1	2	1	1	3	3	3	3	3	4	3	1	3	3	4	1	3	3	2	2	2	2	2	2	2	3
8	17	2	2	2	2	1	2	2	2	2	2	2	2	2	1	2	2	2	6	6	6	6	6	6	6	6	6	6	6	6	3	3	3	3	2	3	3	3	4	3
9	19	2	1	4	3	3	3	2	2	2	3	1	1	3	1	1	1	3	1	4	3	5	7	3	6	3	3	3	5	1	3	2	3	4	4	3	3	3	2	3
10	19	1	2	3	3	3	5	1	3	1	3	1	1	3	1	1	1	1	7	7	7	7	7	7	7	7	7	7	7	7	3	3	3	3	3	4	2	2	3	1
11	18	2	2	1	5	2	1	2	3	1	2	2	2	2	2	2	2	5	4	4	3	4	6	5	5	3	3	6	5	4	3	3	3	3	2	3	3	2	3	3
13	18	1	2	4	1	2	1	1	2	1	2	1	1	1	1	2	1	1	6	6	6	6	7	6	6	6	6	6	6	6	4	3	3	4	2	3	2	4	4	3
14	18	2	2	2	4	1	4	1	2	2	1	1	1	1	1	1	1	1	3	3	3	3	5	1	2	2	6	3	3	3	3	3	3	3	3	3	2	3	3	3
15	17	1	2	1	2	1	2	1	1	1	1	1	2	1	1	1	1	1	7	6	7	7	7	5	5	7	5	7	6	6	3	3	3	2	2	3	3	4	4	4
16	17	1	2	3	4	2	3	1	2	4	2	1	2	2	1	1	1	1	4	4	4	4	4	4	4	4	4	4	4	4	2	3	3	2	2	2	2	2	2	3
17	18	1	1	1	3	1	2	1	4	1	2	1	1	2	1	1	2	5	7	7	4	7	7	7	7	4	7	7	4	4	3	3	2	3	2	4	3	4	3	3
17	17	2	1	2	4	4	2	1	3	1	1	1	2	2	2	1	1	1	3	3	3	3	3	3	3	3	3	4	4	4	4	4	4	3	2	4	3	3	3	3
19	17	1	2	2	4	3	4	3	3	1	3	2	2	3	1	1	2	5	2	2	4	5	3	4	4	3	5	5	3	4	3	4	3	3	2	2	2	2	2	3
20	18	1	2	4	2	1	2	1	2	1	1	1	1	1	1	1	1	1	7	6	7	7	7	6	6	7	6	7	7	6	4	3	3	3	2	3	3	4	4	4
21	18	1	2	2	2	2	1	1	1	1	1	1	1	1	1	1	1	1	4	6	5	6	6	6	6	6	6	6	6	6	3	3	2	3	2	3	3	3	3	3
22	17	2	2	3	4	2	2	1	2	1	2	5	1	2	1	1	3	4	3	4	2	6	2	2	6	2	5	3	1	1	2	4	3	1	3	3	4	3	4	3
23	17	1	2	3	2	2	1	1	2	1	1	2	2	1	1	2	1	1	6	6	6	6	6	6	6	6	6	6	6	1	4	4	1	4	1	4	4	1	1	4
24	16	1	2	2	1	1	1	1	2	1	1	1	1	2	1	1	1	1	3	3	7	5	3	6	6	5	5	5	5	4	4	4	1	4	1	4	4	4	4	1
25	17	1	2	2	2	3	2	2	3	3	3	3	2	2	1	2	3	3	3	3	7	5	3	6	6	5	5	5	5	4	4	4	1	4	1	4	4	4	4	1
26	15	1	1	1	1	1	2	1	3	1	1	1	1	3	1	1	1	1	6	5	7	7	6	5	3	6	4	6	4	4	3	3	2	3	2	2	3	3	3	3
27	18	1	2	3	2	1	3	1	1	1	1	1	3	3	5	1	1	1	1	5	7	7	7	7	7	7	7	7	7	7	2	2	4	3	2	3	3	4	4	4
28	17	1	1	2	3	2	1	2	3	2	2	2	1	1	2	2	1	1	4	4	4	4	6	4	4	4	4	2	2	1	3	3	3	3	2	3	2	2	3	2
29	17	1	2	3	2	1	1	1	2	2	2	1	1	1	1	2	2	3	7	5	4	4	6	4	4	4	6	2	2	1	3	3	3	3	2	3	2	3	3	2
30	16	2	2	3	2	1	2	2	2	2	2	2	1	2	1	1	1	1	4	3	4	3	4	4	4	3	4	4	4	5	2	2	2	3	2	3	2	3	2	3
31	16	2	1	3	3	2	2	1	2	5	2	1	1	2	1	2	2	1	7	7	7	6	5	5	4	6	6	4	4	5	2	2	2	3	2	3	3	2	3	2
32	18	2	2	2	3	1	1	1	1	1	3	1	1	3	1	1	1	1	3	1	7	7	6	6	3	6	6	7	5	6	3	3	2	3	2	3	3	2	2	3
34	18	2	1	4	3	3	2	1	3	1	2	2	2	1	1	1	1	1	7	7	7	7	7	7	7	7	7	7	6	7	4	4	4	4	4	4	4	4	4	4
35	17	2	1	2	1	1	1	1	1	1	1	1	1	1	1	1	1	1	7	7	7	7	7	7	7	7	7	7	7	7	4	4	4	4	1	4	4	1	1	4
36	15	2	2	1	4	3	1	1	3	4	3	1	1	1	1	1	1	1	7	7	5	6	7	3	3	3	3	3	7	5	3	3	2	3	2	3	2	2	1	4
37	17	2	1	2	4	2	2	1	3	1	2	1	1	1	1	1	1	1	3	2	3	3	3	4	3	3	4	3	3	3	4	4	1	4	1	4	4	1	1	4
38	16	1	2	3	3	1	1	1	1	1	1	1	1	1	1	1	1	1	4	4	3	5	5	5	5	5	3	6	4	5	3	2	2	2	2	2	2	3	3	3
39	16	1	2	3	2	1	2	1	3	1	2	1	1	2	1	1	1	1	6	2	2	3	2	3	2	2	1	3	4	6	3	3	2	2	2	2	2	2	2	4
40	16	1	2	2	3	1	1	1	1	1	1	1	1	3	2	1	1	2	7	6	7	6	4	5	7	5	5	7	6	7	3	3	2	3	2	3	2	2	3	3
41	17	1	2	3	1	2	1	1	1	1	2	1	1	1	2	1	1	1	6	5	5	5	4	6	6	6	6	4	5	5	3	3	3	3	3	3	3	3	3	3
42	16	1	2	4	3	3	4	3	4	1	3	5	2	3	1	5	1	3	3	5	3	3	3	3	6	5	6	4	3	6	3	3	3	3	3	3	3	3	4	4
43	16	1	2	4	3	1	4	1	2	1	1	1	1	4	1	5	1	5	7	7	7	7	7	1	1	7	7	7	7	4	3	3	1	1	2	4	4	4	4	4
44	15	1	2	2	1	2	2	1	3	1	2	1	1	3	1	1	1	1	6	6	6	6	6	6	6	6	6	6	6	6	3	3	3	3	2	3	3	3	3	3
45	16	2	2	1	3	1	1	1	2	1	2	1	1	3	1	1	1	1	6	6	6	6	6	6	6	5	6	5	7	3	3	3	2	3	2	3	3	2	2	3
46	15	2	1	2	1	1	1	1	1	1	1	1	1	1	1	1	1	1	7	7	7	7	7	6	6	7	6	7	7	7	4	4	4	1	4	4	4	4	4	4
47	16	2	2	4	3	1	3	1	2	1	1	1	1	3	1	1	1	1	7	7	7	7	7	7	7	7	7	7	7	7	3	3	3	3	2	3	3	3	3	3
48	17	1	2	3	2	2	1	1	2	2	2	1	1	2	1	1	2	2	5	5	4	5	5	2	3	5	5	5	5	5	3	2	3	3	2	2	2	2	3	3
49	17	1	2	1	4	4	4	4	4	4	4	5	2	2	3	4	2	4	2	1	1	1	1	1	2	2	2	2	2	3	3	3	4	2	2	2	2	3	3	3
50	15	2	1	2	2	2	1	3	1	1	2	1	2	3	1	2	2	2	7	7	7	7	7	7	6	4	7	7	5	6	4	4	4	4	3	3	3	4	4	4
51	17	2	2	4	2	3	2	1	3	2	1	1	1	1	1	1	1	1	7	4	7	7	7	4	4	5	1	7	4	1	3	3	3	2	2	3	3	2	2	2
52	17	2	2	2	3	1	1	1	2	2	2	1	1	1	1	1	1	1	1	2	4	4	2	3	3	3	4	4	2	3	3	3	2	3	2	3	3	4	4	3
53	17	2	1	4	3	2	2	1	2	1	1	1	1	2	1	1	1	5	3	3	5	4	4	5	4	4	4	3	3	3	3	3	3	3	1	3	3	2	2	3
54	17	2	2	4	3	1	1	1	2	1	1	1	1	1	1	1	1	1	4	5	5	5	5	5	5	5	4	4	1	4	3	3	3	3	2	3	3	3	3	3
55	15	1	2	2	1	1	2	1	2	1	1	1	1	1	1	1	1	1	6	6	5	5	6	5	4	5	4	5	6	6	3	3	3	3	2	3	3	2	3	3
1	18	2	1	3	2	2	2	2	2	1	1	1	1	2	1	3	1	1	2	5	7	6	4	3	4	6	4	4	5	5	2	2	2	2	2	3	3	2	2	3
2	15	1	2	3	4	3	3	3	3	2	5	3	2	4	5	1	1	2	4	6	5	3	5	5	5	5	6	3	3	3	2	3	3	3	3	3	3	2	2	3
3	16	2	2	2	2	2	1	1	2	1	2	1	1	1	1	1	5	5	7	7	7	7	7	7	7	7	7	7	7	7	4	2	3	3	2	3	2	3	3	3
4	17	2	1	2	2	1	1	1	1	3	1	1	1	5	1	1	1	1	7	5	5	7	7	7	7	2	5	7	3	3	3	3	2	3	2	3	2	4	4	4
5	16	2	2	2	2	1	2	2	3	1	2	1	2	2	1	2	1	3	4	5	6	2	5	5	6	4	5	4	5	4	3	2	2	2	2	3	3	2	2	3
6	16	2	2	2	2	2	2	1	2	1	2	1	1	2	1	1	1	1	6	6	7	7	7	6	6	7	6	7	7	7	3	3	2	4	1	3	3	2	1	4
7	16	1	2	2	3	2	2	2	2	2	2	1	1	1	2	1	1	3	3	7	4	5	3	1	1	6	4	4	5	3	2	2	2	3	2	2	2	2	2	3
8	18	2	1	4	4	2	3	2	2	1	3	1	2	2	1	3	1	1	7	7	7	7	7	7	7	7	7	7	7	7	2	2	2	3	2	2	2	2	2	4
9	15	1	2	1	1	2	2	2	2	2	2	1	1	2	1	2	2	2	2	3	3	3	3	3	3	3	3	3	3	3	3	3	2	3	2	3	2	2	2	3
10	17	2	1	2	2	2	3	5	2	2	2	1	2	2	1	2	1	2	2	2	3	4	2	5	1	2	4	2	3	5	4	3	3	2	3	2	3	2	2	3
11	19	2	2	2	4	3	3	3	2	3	2	3	2	2	1	2	1	2	4	4	4	6	7	6	6	4	6	5	3	4	4	3	4	4	3	3	3	4	4	2
12	16	1	2	2	2	1	2	1	1	2	1	1	1	3	1	1	1	2	4	6	5	6	4	4	3	5	5	4	4	3	4	4	3	4	2	4	3	3	4	4
13	17	2	2	2	2	2	2	2	2	3	2	3	2	2	2	2	2	3	2	2	3	4	4	4	4	4	4	4	5	4	1	2	2	2	3	2	1	3	2	3
14	16	2	2	2	1	2	2	1	1	1	1	1	1	1	1	1	1	1	3	5	6	5	6	4	5	4	4	5	4	5	3	2	3	2	2	2	2	3	3	3
15	16	2	2	4	2	2	1	2	2	2	2	2	1	1	1	2	2	2	6	6	6	6	6	6	6	6	6	6	6	6	2	2	3	2	3	2	2	3	3	2
16	17	2	2	4	5	1	5	1	1	1	1	1	1	1	5	1	1	1	7	7	7	7	7	7	7	7	7	7	7	7	3	3	2	3	2	3	3	4	4	3
17	18	1	2	1	4	1	1	1	1	1	1	1	1	1	1	1	1	1	5	5	5	5	5	5	5	5	5	5	5	5	4	4	3	4	3	4	4	3	3	4
18	16	2	2	2	4	4	3	4	4	4	2	2	4	1	1	3	4	5	4	4	4	4	4	4	4	4	4	1	1	1	2	3	2	4	4	1	1	4	4	1
19	17	2	2	3	1	1	1	1	1	1	2	1	1	3	1	1	1	1	6	6	5	5	4	3	4	6	4	7	4	4	4	3	3	3	2	2	4	4	4	4
20	16	2	2	3	1	1	1	1	1	1	2	1	1	3	1	1	1	1	6	6	5	5	4	3	4	6	4	7	4	4	4	3	3	3	2	2	4	4	4	4
21	16	2	2	3	1	1	1	1	1	1	2	1	1	2	1	1	1	1	6	6	5	5	4	3	4	6	4	7	4	4	4	3	3	3	2	2	4	4	4	4
22	18	2	1	2	2	1	2	3	2	1	1	2	1	3	1	1	2	3	4	3	6	6	5	6	5	6	5	3	4	5	2	2	3	3	3	3	2	2	2	2
23	16	1	2	4	3	3	2	2	3	2	2	1	3	3	1	2	2	3	5	5	5	5	4	4	4	4	4	3	3	3	4	4	1	3	2	3	2	3	4	2
24	17	1	2	4	3	2	2	2	2	2	2	1	2	2	1	2	2	1	5	4	4	4	5	4	4	3	5	4	4	6	3	3	3	3	2	2	2	3	3	3
25	17	2	2	1	3	1	1	1	2	1	1	1	1	1	1	1	1	1	6	6	6	6	6	6	6	6	6	6	6	6	3	3	2	3	2	3	3	2	2	3
26	17	2	2	1	3	3	3	1	3	1	1	1	3	3	1	1	1	1	6	6	6	6	6	6	6	6	6	6	6	6	3	3	2	3	2	3	3	2	2	3
27	17	2	1	2	5	4	5	3	3	1	5	1	1	1	1	1	1	1	1	4	7	7	7	4	4	7	1	7	7	7	3	2	1	3	2	2	3	1	1	3
28	17	2	2	3	2	2	1	1	2	1	1	1	2	2	1	2	1	2	3	4	4	5	4	4	3	3	3	2	2	2	2	3	2	2	3	2	2	2	3	3
29	18	1	2	3	1	3	3	1	3	1	3	1	1	1	1	1	1	1	2	2	2	2	1	1	4	2	4	1	1	1	4	3	2	3	1	4	4	1	1	4
30	16	1	1	3	2	1	1	1	1	1	1	1	1	1	1	1	1	1	5	5	5	6	5	6	5	6	5	6	5	5	3	3	2	3	1	3	4	1	2	4
31	18	2	1	2	2	2	2	1	2	2	2	1	2	1	1	1	1	2	4	7	7	7	7	6	5	7	7	7	5	7	3	2	2	3	2	3	2	2	1	2
32	16	2	2	3	2	1	1	1	1	3	1	1	1	1	1	1	1	1	1	1	1	1	2	1	3	1	1	1	1	1	4	4	1	4	1	4	4	1	1	4
33	17	2	1	2	5	5	1	1	5	3	1	1	3	2	1	1	1	1	1	1	1	1	1	1	1	1	1	1	1	1	4	4	1	4	1	4	4	1	1	4
34	16	1	2	4	5	3	5	3	5	5	3	3	3	2	1	1	1	5	4	4	3	4	3	4	4	3	7	3	3	6	3	3	3	2	3	3	2	3	3	3
35	18	2	2	4	1	1	1	4	2	4	4	4	2	1	2	4	5	5	1	2	3	4	5	7	7	5	4	2	3	4	3	2	3	3	3	2	2	3	2	3
36	19	2	1	1	3	1	1	3	1	3	3	3	1	1	1	1	2	2	1	1	3	4	5	6	5	4	3	3	2	1	2	3	2	3	3	1	2	2	1	2
37	17	2	2	3	4	3	2	2	3	2	2	2	2	2	3	2	2	2	6	4	4	4	4	3	3	3	3	3	2	3	2	2	3	2	3	2	2	3	3	2
38	17	2	2	2	2	3	2	1	2	1	2	3	2	3	2	2	1	2	2	2	2	2	3	2	1	1	1	1	1	1	2	2	3	2	3	2	3	3	3	3
39	18	1	2	2	4	3	1	1	3	1	3	3	1	1	1	1	1	1	1	3	3	3	1	3	3	3	3	1	1	1	3	3	3	3	2	3	3	3	3	3
40	17	1	2	3	2	1	1	1	2	1	1	1	1	2	1	1	1	3	7	6	7	7	7	7	7	7	7	7	5	5	3	3	3	3	3	3	3	3	3	3
41	16	1	2	2	2	1	1	1	2	1	1	1	2	2	1	3	2	2	3	5	6	6	6	6	4	6	6	6	4	6	4	4	3	3	2	2	2	3	3	4
42	17	2	2	3	3	5	3	5	2	2	5	5	3	1	1	1	1	1	5	7	6	7	7	7	7	7	7	7	7	7	4	4	4	4	4	4	4	4	4	4
43	15	1	2	3	3	2	2	1	3	1	1	1	2	2	1	1	1	1	6	6	6	6	6	6	6	6	6	6	6	6	3	3	2	3	2	3	3	2	2	3
44	17	2	2	2	4	3	2	3	3	3	2	3	4	2	3	1	2	3	5	5	3	4	4	4	4	4	4	4	4	4	3	2	2	2	3	2	3	3	2	2
45	17	2	1	2	4	2	2	2	2	2	1	1	2	3	1	2	2	2	3	3	3	3	3	3	3	3	3	2	2	2	2	2	3	2	3	2	2	3	3	2
46	19	2	2	3	5	3	3	1	2	1	4	1	1	3	1	1	1	1	4	4	4	4	4	4	4	4	4	4	4	4	3	3	2	3	2	3	3	2	2	3
47	16	1	2	2	1	1	1	1	1	1	1	1	3	1	1	1	1	1	7	7	7	7	7	7	7	7	7	7	7	7	3	3	3	3	3	2	2	4	4	3
48	18	1	2	3	3	1	1	1	2	2	2	2	1	2	2	1	2	2	1	1	2	2	2	1	2	1	2	1	1	1	3	3	2	4	1	4	4	2	2	3
49	16	1	2	2	1	1	1	1	1	1	1	1	1	1	1	1	1	1	6	6	6	6	6	4	5	6	6	6	6	6	3	4	2	3	2	3	3	2	2	3
50	18	1	2	2	3	2	2	1	2	1	2	1	1	1	1	1	1	1	7	7	7	7	7	7	7	7	7	7	7	7	3	2	1	2	1	2	2	1	1	4
51	17	1	2	4	1	1	1	1	2	1	1	1	2	1	5	5	2	5	6	6	6	6	6	6	6	6	6	6	6	6	4	3	4	1	4	1	1	4	4	1
52	16	2	2	2	5	2	2	3	2	2	2	1	2	4	1	1	1	5	4	3	4	5	3	4	3	2	3	4	3	4	2	3	3	3	3	3	2	4	1	4
53	18	2	2	2	5	1	2	1	3	1	2	1	1	2	3	1	2	1	7	7	7	7	7	7	7	7	7	7	7	7	1	3	4	1	4	1	1	4	4	1
55	17	1	2	2	1	1	1	1	1	3	1	1	1	3	1	1	1	1	6	6	6	6	6	6	6	6	6	6	6	6	3	3	2	3	2	3	3	2	2	3
1	17	2	2	1	2	1	1	1	2	1	1	1	1	2	2	1	2	2	3	3	4	5	3	4	4	4	3	3	4	4	3	3	3	2	2	3	4	1	2	2
2	17	1	2	2	3	5	2	3	1	1	2	1	2	3	1	1	1	1	6	6	6	6	6	5	6	6	6	6	6	6	4	4	3	4	1	2	3	3	3	3
3	17	2	1	3	2	1	1	1	1	1	1	1	1	1	1	1	1	2	1	1	1	1	1	1	1	1	1	2	7	2	1	1	1	2	3	2	1	3	3	3
4	17	2	2	3	3	2	1	1	1	1	1	1	1	3	1	3	1	1	1	1	1	1	1	1	1	1	1	1	1	1	4	4	1	4	1	4	4	1	1	4
5	17	2	2	3	3	1	1	1	2	1	1	1	1	1	1	1	1	1	4	5	4	5	5	6	6	6	6	5	6	3	3	2	2	3	3	2	3	3	2	3
6	17	1	1	1	1	2	2	1	2	1	1	1	2	2	2	2	3	3	3	4	3	4	4	4	4	4	4	4	4	4	3	3	3	3	2	3	3	2	2	3
7	17	1	1	4	2	2	1	1	2	1	1	1	1	1	1	1	1	1	6	7	3	5	1	1	6	3	7	6	5	7	2	1	2	4	2	4	3	1	1	3
8	16	2	2	4	1	3	3	1	1	1	1	1	1	2	1	1	1	1	4	1	7	6	6	7	5	4	6	4	5	4	3	2	3	3	2	3	3	2	2	3
9	16	1	2	2	2	2	1	1	2	1	2	1	1	2	1	1	1	1	4	4	4	6	5	3	4	5	6	1	1	1	4	3	3	4	1	4	3	3	4	3
10	17	1	2	2	2	2	2	2	2	1	1	1	2	1	1	3	1	1	4	4	4	4	5	4	4	4	5	4	4	5	4	4	2	3	2	4	4	2	1	3
11	17	1	2	2	2	1	2	1	2	2	2	1	1	1	1	1	1	1	6	6	7	7	6	6	5	6	6	7	7	6	3	3	3	3	2	3	3	3	3	4
12	16	2	2	1	2	2	1	2	2	1	1	1	1	1	1	1	1	1	5	6	7	7	7	6	5	6	7	6	7	6	4	4	2	3	1	3	3	1	2	3
13	17	1	2	2	2	1	1	1	2	1	1	1	2	2	1	1	1	2	3	3	3	3	3	5	5	5	5	7	1	6	4	2	3	3	1	2	2	2	2	3
14	17	1	1	3	5	2	5	1	3	5	2	1	1	3	1	1	1	1	3	5	3	3	3	5	5	5	5	7	1	6	4	2	3	3	1	2	2	2	2	3
15	16	1	2	2	4	3	2	2	3	3	3	2	1	1	1	1	1	1	3	1	1	1	1	1	1	1	1	1	4	1	2	2	2	2	1	3	2	2	2	3
16	17	1	2	2	4	3	2	5	5	5	4	2	2	1	1	1	1	2	5	6	3	6	6	4	4	6	7	4	3	6	2	3	2	2	2	2	1	2	1	4
17	16	1	2	2	2	2	1	1	2	2	1	1	1	1	1	3	2	2	3	3	3	3	3	3	3	3	3	4	4	4	2	3	2	3	2	2	3	2	2	2
18	16	1	2	2	3	2	1	1	3	2	3	1	1	1	1	1	1	4	5	5	5	5	5	5	3	3	3	4	4	4	3	3	3	3	2	3	3	2	2	3
19	16	1	1	2	2	3	1	1	2	1	2	1	2	1	1	1	1	3	2	3	4	6	5	3	3	4	3	3	4	4	3	2	2	3	2	3	3	3	3	2
20	15	1	2	2	4	4	1	2	4	5	3	4	1	1	1	1	2	2	1	7	1	4	4	1	3	7	5	4	3	5	2	2	1	3	1	2	2	1	1	4
21	16	1	2	2	3	3	1	1	2	1	1	1	1	1	1	1	1	1	6	6	6	6	6	6	6	7	6	6	6	6	3	3	3	3	3	3	3	4	4	3
22	17	2	2	2	5	5	3	2	5	1	3	3	3	3	1	3	1	3	3	5	6	6	6	6	6	1	7	4	3	7	2	2	2	2	1	2	2	2	2	3
23	17	2	1	2	2	2	2	1	1	3	1	1	1	3	1	1	1	1	5	5	6	6	6	6	1	1	7	4	2	7	2	2	2	3	1	2	2	2	2	3
24	16	1	2	2	2	1	1	1	2	1	1	1	1	3	1	1	1	2	7	6	4	4	4	6	4	1	6	6	2	6	3	2	4	3	2	3	3	2	3	3
25	15	1	2	3	2	1	2	1	1	4	1	1	1	2	1	1	1	1	6	5	6	7	7	6	4	7	7	7	5	6	3	3	4	3	3	4	4	4	4	4
26	16	2	1	2	1	1	1	1	1	3	1	1	1	1	1	2	1	1	3	3	3	4	4	5	5	5	5	3	4	3	3	2	4	4	1	3	3	4	4	3
27	17	1	2	2	3	2	2	1	2	2	1	1	1	2	1	2	2	3	5	5	4	4	4	4	3	4	4	4	3	5	2	2	3	3	2	3	3	3	3	3
28	17	1	2	2	3	2	2	1	3	1	2	1	1	2	1	1	1	1	3	2	7	7	7	5	7	1	4	4	4	4	3	3	4	3	4	3	3	4	4	3
29	18	1	2	4	1	1	1	1	1	1	2	1	1	1	1	1	1	1	5	4	4	5	4	5	5	4	5	3	4	7	2	3	3	3	2	2	3	2	3	3
30	17	2	2	2	1	1	2	1	1	1	1	1	1	3	1	1	1	1	3	2	4	1	3	7	4	2	7	5	4	2	3	3	2	3	2	3	3	2	2	3
31	17	2	1	3	4	2	2	2	4	2	2	2	2	2	2	2	1	2	4	4	4	3	2	4	4	3	5	4	4	4	3	2	3	2	2	3	3	3	2	3
32	16	1	2	3	5	3	2	2	2	2	2	4	1	3	1	3	3	3	5	5	4	5	5	4	3	3	5	6	3	4	2	2	2	2	2	2	2	2	2	2
33	17	1	2	3	3	2	2	2	3	1	2	2	1	3	1	1	1	1	4	5	5	5	6	5	4	4	5	6	3	4	2	2	3	2	2	2	2	3	3	3
34	16	1	2	4	3	2	2	3	2	3	2	1	3	2	1	3	1	2	6	5	5	5	5	6	5	5	6	6	5	6	2	2	3	2	2	2	2	3	3	3
35	17	1	2	2	3	3	1	1	2	2	1	2	3	3	1	1	2	1	5	4	4	5	4	5	5	4	5	3	4	7	2	3	3	3	2	2	3	2	3	3
36	18	2	2	2	2	1	1	2	2	5	1	1	1	2	1	1	1	1	4	5	4	5	4	3	3	5	4	3	5	4	3	1	3	2	3	1	2	3	3	2
37	16	1	2	2	1	1	1	1	1	1	1	1	1	3	1	1	1	1	3	3	6	6	3	1	1	6	1	5	5	5	3	3	3	3	2	3	3	3	3	3
38	18	1	1	2	3	1	2	1	1	2	1	1	1	2	1	1	1	1	3	3	4	4	4	3	3	4	3	5	5	5	3	3	3	3	2	3	3	3	3	3
39	17	1	2	2	4	1	1	1	1	1	1	1	1	4	1	1	1	1	3	5	4	5	5	5	4	5	5	5	4	4	3	3	1	3	2	3	3	2	3	3
40	17	1	2	2	2	2	3	1	2	1	1	1	1	3	1	2	1	2	4	4	4	5	6	6	6	6	6	5	3	5	4	4	3	4	2	4	4	4	4	4
41	17	1	2	2	2	2	1	1	2	2	1	1	1	1	1	1	1	1	6	6	6	6	6	6	6	6	6	6	3	6	4	4	3	4	2	4	4	4	4	4
42	17	2	2	2	1	1	1	2	1	2	3	2	1	1	1	5	3	2	7	4	7	7	5	3	3	3	4	7	5	5	3	3	3	2	2	3	3	3	4	4
43	17	1	2	3	3	1	1	1	3	1	1	2	3	4	4	1	3	1	5	3	4	3	3	2	1	2	2	7	4	2	2	2	1	2	2	2	2	1	1	3
44	18	1	2	2	2	2	2	1	1	1	2	1	1	2	1	1	2	1	3	3	6	5	5	4	4	4	4	5	4	5	3	3	4	3	2	3	3	3	3	3
45	15	1	2	3	2	2	2	1	2	2	2	1	1	3	1	1	3	1	4	4	3	3	5	4	5	3	5	5	3	6	2	2	2	2	3	2	3	3	3	3
46	17	2	1	1	5	2	2	1	2	1	2	1	1	2	1	1	1	2	4	5	4	4	4	4	4	4	4	4	4	4	3	3	2	3	2	3	3	2	2	3
47	17	1	2	1	4	3	3	5	3	4	5	1	1	2	1	1	3	5	1	1	1	1	6	4	3	1	4	6	1	6	3	4	2	4	1	2	2	2	1	4
48	19	2	2	2	2	1	1	1	2	1	1	1	1	3	1	1	1	1	4	3	6	6	6	5	4	5	5	4	5	5	3	3	3	3	3	4	3	3	3	3
49	17	1	2	1	3	2	5	2	3	1	2	1	2	2	2	4	1	5	3	5	5	4	2	3	1	5	2	2	1	3	2	1	2	3	2	1	2	2	3	4
50	16	1	2	1	2	1	1	2	1	3	2	1	1	2	1	2	1	1	5	4	5	5	6	6	5	6	6	5	6	6	3	2	2	3	3	3	3	3	3	2
51	17	2	1	2	3	4	4	1	2	1	1	1	1	4	1	1	1	4	6	7	6	6	7	6	3	5	6	6	2	7	3	3	2	2	1	2	4	2	2	2
52	17	1	1	3	2	3	1	1	2	1	2	1	1	1	1	1	1	1	6	7	4	7	7	4	4	7	4	4	4	4	4	3	3	4	1	4	4	4	4	4
53	17	1	2	4	4	5	5	4	5	3	5	1	3	3	2	2	1	1	5	4	6	6	5	5	4	5	5	6	5	4	3	3	3	3	2	3	3	2	2	3
54	16	2	1	3	2	2	2	1	1	1	2	1	1	2	1	1	1	2	4	4	4	7	7	6	7	4	6	7	6	7	3	3	3	2	2	3	3	3	3	3
55	17	2	2	3	5	3	1	2	3	4	3	3	1	3	1	1	1	2	3	4	4	4	4	4	3	3	3	4	4	3	2	2	2	3	2	2	2	3	3	2
56	17	1	1	3	2	1	2	1	1	1	2	1	1	2	1	1	1	1	6	6	6	6	6	6	4	5	6	5	4	6	3	3	3	3	2	2	2	2	2	3
